# Supplementary material for: Learning from Fifteen Years of Genome-Wide Association Studies in Age-Related Macular Degeneration
Source: MDPI journal article supplement (doi:10.3390/cells9102267), 2020-10-10
Supplement: s1 [file s1]

**GWAS publication**

- Fritsche et al.; Nat Genet. 2013 Apr; 45(4): 433–439e2
- Fritsche et al.; Nat Genet. 2016 Feb; 48(2):134-143

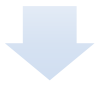

**Web of Science**  
**Cited reference search**

- Accessed on Jul 7, 2020
- Web of Science Core Collection
- Export the “Full citation report”

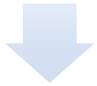

**Quality control**

- Removal of duplicated entries in the citation reports
- Studies citing both GWAS publications were exclusively assigned to Fritsche et al. 2016

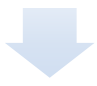

**Categorization of citations**  
**into five categories**

- Genetic association study
- Experimental study
- Clinical study
- Review article
- Referencing only

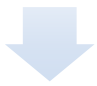

**Comparative analysis**

- Category distribution
- Investigated loci
