# Supplementary figures and images for: Learning from Fifteen Years of Genome-Wide Association Studies in Age-Related Macular Degeneration
Source: MDPI journal article supplement (doi:10.3390/cells9102267), 2020-10-10

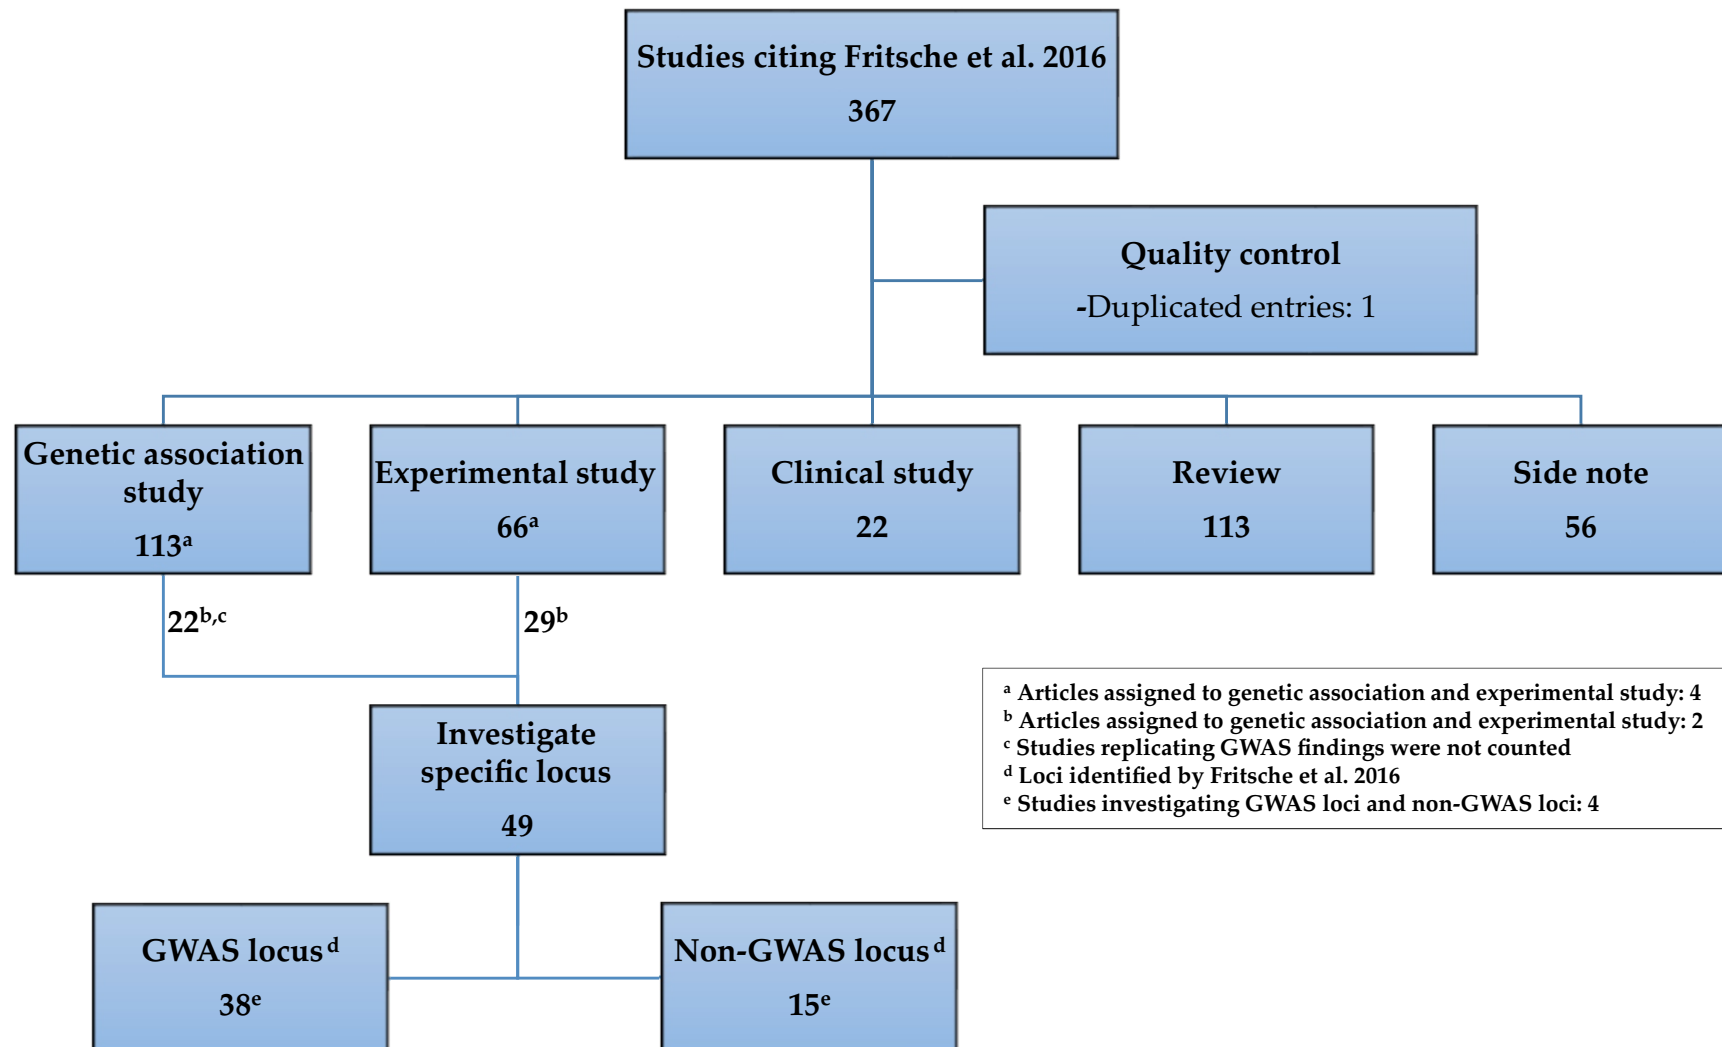

Supplement: s1 [file s1]

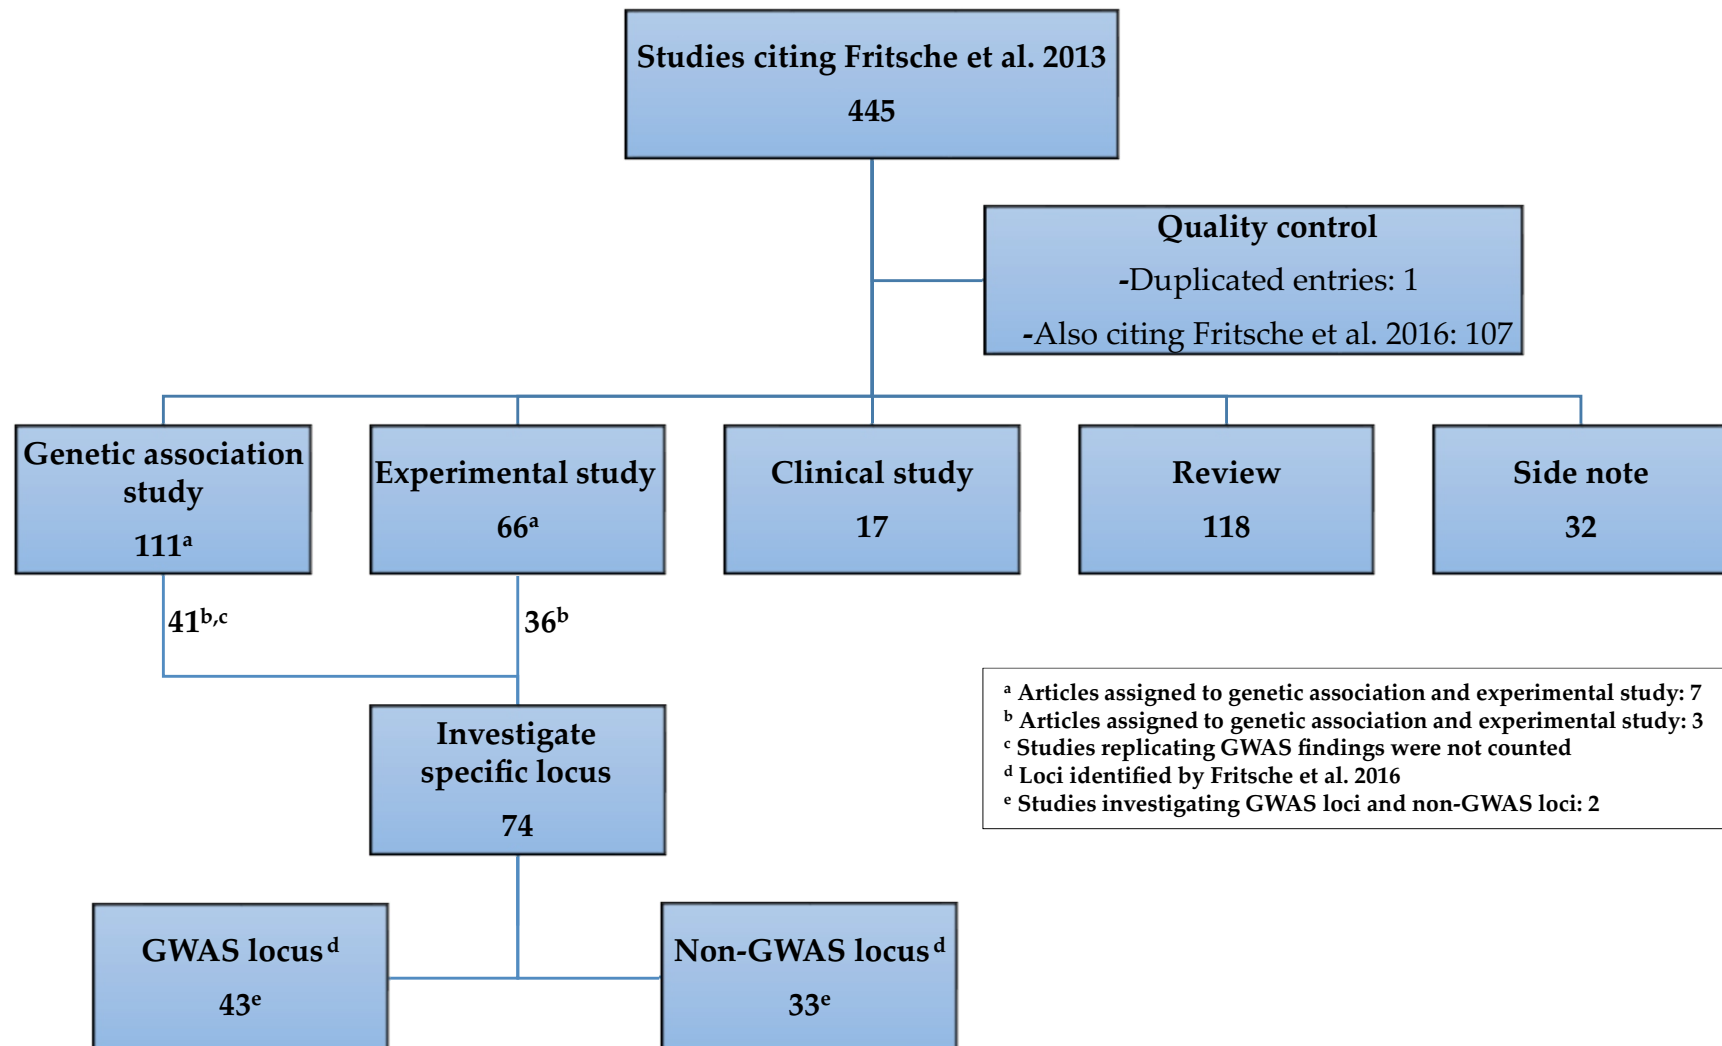

Supplement: s1 [file s1]
